# Supplementary material for: Wastewater-based epidemiology applied at the building-level reveals distinct virome profiles based on the age of the contributing individuals
Source: PubMed Central journal article supplement (PMC10832175; doi:10.1186/s40246-024-00580-1), 2024-02-01
Supplement: 40246_2024_580_MOESM1_ESM.pdf [file 40246_2024_580_MOESM1_ESM.pdf]

**Supplementary information 1:** List of Viral species and serotypes, serogroups or genotypes identified in each building type. Mean ID%: average percentage identity of alignments; Mean CV: the percent of the reference accession that is covered by at least one contig; Coverage depth: indicates the average read depth across the length of the accession. Metagenomic metrics are mean values obtained at the different samples analysed per each building type and at the WWTP.

| Sampling site               | Family                      | Viral specie                            | metagenomics metrics |          |                | Serotypes, serogroups or genotypes identified |  |
|-----------------------------|-----------------------------|-----------------------------------------|----------------------|----------|----------------|-----------------------------------------------|--|
|                             |                             |                                         | Mean ID%             | Mean CV% | Coverage depth |                                               |  |
| School                      | <i>Adenoviridae</i>         | <i>Human mastadenovirus F</i>           | 99.9                 | 7        | 2.2x           | AdV-40, AdV-41                                |  |
|                             | <i>Astroviridae</i>         | <i>Astrovirus MLB1</i>                  | 97.5                 | 5.9      | 0.33x          |                                               |  |
|                             |                             | <i>Mamastrovirus 1</i>                  | 99.35                | 97.5     | 2490x          | HAstV-1, HAstV-3                              |  |
|                             |                             | <i>Mamastrovirus 3</i>                  | 98.9                 | -        | -              |                                               |  |
|                             |                             | <i>Unclassified Mamastrovirus</i>       | 93.1                 | -        | -              |                                               |  |
|                             | <i>Caliciviridae</i>        | <i>Human salivirus</i>                  | 95.8                 | -        | -              |                                               |  |
|                             |                             | <i>Salivirus FHB</i>                    | 98                   | -        | -              |                                               |  |
|                             |                             | <i>Sapporo virus</i>                    | 97.55                | 25.6     | 22.5x          | SapV-GI, -GII, -GIV                           |  |
|                             |                             | <i>Unclassified Sapovirus</i>           | 97.8                 | -        | -              |                                               |  |
|                             | <i>Parvoviridae</i>         | <i>Human bocavirus</i>                  | 99.8                 | 52.6     | 96.1x          |                                               |  |
|                             | <i>Picornaviridae</i>       | <i>Parechovirus A</i>                   | 91.9                 | 9.3      | 2.6x           |                                               |  |
|                             |                             | <i>Aichivirus A</i>                     | 97.3                 | -        | -              |                                               |  |
|                             |                             | <i>Cardiovirus B</i>                    | 93                   | 4.1      | 0.24x          |                                               |  |
|                             |                             | <i>Enterovirus C</i>                    | 93.2                 | 4.8      | 0.44x          |                                               |  |
| <i>Norwalk virus</i>        |                             | 99.7                                    | 7.3                  | 0.69x    | NoVGII.17      |                                               |  |
| <i>Polyomaviridae</i>       | <i>Human polyomavirus 1</i> | 99.9                                    | 59.6                 | 178.2x   |                |                                               |  |
|                             | <i>Human polyomavirus 2</i> | 99.4                                    | -                    | -        |                |                                               |  |
| University                  | <i>Adenoviridae</i>         | <i>Human mastadenovirus F</i>           | 99.93                | 4.3      | 0.31x          |                                               |  |
|                             | <i>Astroviridae</i>         | <i>Mamastrovirus 1</i>                  | 98                   | 5.4      | 0.48x          | HAstV-1, HAstV-3                              |  |
|                             | <i>Caliciviridae</i>        | <i>Human salivirus</i>                  | 95.6                 | 25       | 3.9x           |                                               |  |
|                             |                             | <i>Norwalk virus</i>                    | 99.7                 | 23.6     | 3.5x           |                                               |  |
|                             |                             | <i>Salivirus A</i>                      | 94.1                 | -        | -              |                                               |  |
|                             |                             | <i>Salivirus FHB</i>                    | 96.8                 | 45       | 52x            |                                               |  |
|                             |                             | <i>Sapporo virus</i>                    | 96.4                 | 5.6      | 0.72x          |                                               |  |
|                             | <i>Papillomaviridae</i>     | <i>Alphapapillomavirus 2</i>            | 99.1                 | 5.2      | 1.1x           | HPV-28                                        |  |
|                             |                             | <i>Betapapillomavirus 2</i>             | 99.3                 | 4.9      | 0.32x          | HPV-9, HPV-110                                |  |
|                             |                             | <i>Gammapapillomavirus 7</i>            | 98.6                 | 28       | 2.2x           | HPV-149                                       |  |
|                             | <i>Parvoviridae</i>         | <i>Human bocavirus</i>                  | 99.3                 | 10.9     | 4x             |                                               |  |
|                             | <i>Picornaviridae</i>       | <i>Cardiovirus B</i>                    | 92.35                | -        | -              |                                               |  |
|                             |                             | <i>Enterovirus B</i>                    | 94.6                 | -        | -              |                                               |  |
|                             |                             | <i>Human cosavirus SH4</i>              | 92.8                 | -        | -              |                                               |  |
| <i>Polyomaviridae</i>       | <i>Human polyomavirus 1</i> | 99.8                                    | 25                   | 5.4x     |                |                                               |  |
|                             | <i>Human polyomavirus 2</i> | 99.9                                    | 34.8                 | 20x      |                |                                               |  |
| Nursing home                | <i>Astroviridae</i>         | <i>Mamastrovirus 1</i>                  | 99.5                 | -        | -              |                                               |  |
|                             | <i>Herpesviridae</i>        | <i>Cercopithecine betaherpesvirus 5</i> | 97.5                 | -        | -              |                                               |  |
|                             |                             | <i>Alphapapillomavirus 7</i>            | 99.9                 | -        | -              | HPV-70                                        |  |
|                             | <i>Papillomaviridae</i>     | <i>Betapapillomavirus 1</i>             | 98.8                 | 3.1      | 0.39x          | HPV-105                                       |  |
|                             |                             | <i>Betapapillomavirus 2</i>             | 99.3                 | -        | -              | HPV-22, HPV-100                               |  |
|                             |                             | <i>Betapapillomavirus 3</i>             | 96.6                 | -        | -              | HPV-75                                        |  |
|                             | <i>Picornaviridae</i>       | <i>Cardiovirus B</i>                    | 94.6                 | 7.5      | 1x             |                                               |  |
|                             |                             | <i>Enterovirus C</i>                    | 94.2                 | 39       | 6.5x           | Coxsackie-A22, -A1                            |  |
|                             | <i>Polyomaviridae</i>       | <i>Human polyomavirus 1</i>             | 98.8                 | -        | -              |                                               |  |
|                             |                             | <i>Human polyomavirus 2</i>             | 99.5                 | 9.5      | 1.6x           |                                               |  |
| <i>Human polyomavirus 5</i> |                             | 99.8                                    | 8.9                  | 0.75x    |                |                                               |  |
| WWTP                        | <i>Adenoviridae</i>         | <i>Human mastadenovirus A</i>           | 99.7                 | -        | -              |                                               |  |
|                             |                             | <i>Human mastadenovirus B</i>           | 99.7                 | -        | -              | AdV-7, -21 -B3                                |  |
|                             |                             | <i>Human mastadenovirus F</i>           | 98.1                 | 35.1     | 5.7x           |                                               |  |
|                             | <i>Astroviridae</i>         | <i>Astrovirus MLB1</i>                  | 96.8                 | 15.7     | 2x             |                                               |  |
|                             |                             | <i>Mamastrovirus 1</i>                  | 98.6                 | 88.1     | 182.8x         | HAstV-1, HAstV-3, HAstV-4                     |  |
|                             |                             | <i>Mamastrovirus 6</i>                  | 98.2                 | -        | -              |                                               |  |
|                             |                             | <i>Mamastrovirus 8</i>                  | 96.7                 | 5.2      | 0.2x           |                                               |  |
|                             |                             | <i>HMO Astrovirus A</i>                 | 93.6                 | 13.8     | 2.9x           |                                               |  |
|                             | <i>Caliciviridae</i>        | <i>Human salivirus</i>                  | 97.1                 | -        | -              |                                               |  |
|                             |                             | <i>Norwalk virus</i>                    | 99.7                 | 44.6     | 1.8x           | NV-GI.P10, NV-GII.P7                          |  |
|                             |                             | <i>Salivirus A</i>                      | 96.05                | -        | -              |                                               |  |
|                             |                             | <i>Salivirus FHB</i>                    | 93.5                 | 21       | 2.1x           |                                               |  |
|                             |                             | <i>Sapporo virus</i>                    | 99.3                 | 63.3     | 5.1x           |                                               |  |
|                             | <i>Coronaviridae</i>        | <i>SARS-CoV-2</i>                       | 96.2                 | -        | -              |                                               |  |
|                             |                             | <i>Human coronavirus HKU1</i>           | 100                  | -        | -              |                                               |  |
|                             | <i>Papillomaviridae</i>     | <i>Alphapapillomavirus 14</i>           | 99.9                 | -        | -              | HPV-90                                        |  |
|                             |                             | <i>Betapapillomavirus 1</i>             | 97.1                 | 14.2     | 2x             | HPV-21, HPV-36                                |  |
|                             |                             | <i>Betapapillomavirus 2</i>             | 100                  | 8.8      | 0.8x           | HVP-110                                       |  |
|                             |                             | <i>Betapapillomavirus 3</i>             | 97.9                 | -        | -              | HPV-76                                        |  |
|                             |                             | <i>Betapapillomavirus 4</i>             | 97.2                 | -        | -              | HPV-92                                        |  |
|                             |                             | <i>Gammapapillomavirus 1</i>            | 100                  | -        | -              | HPV-65                                        |  |
|                             |                             | <i>Gammapapillomavirus 3</i>            | 96.9                 | -        | -              | HPV-50                                        |  |
|                             |                             | <i>Gammapapillomavirus 10</i>           | 100                  | 3.1      | 0.35x          | HPV-133                                       |  |
|                             |                             | <i>Gammapapillomavirus 11</i>           | 95.3                 | -        | -              | HPV-169                                       |  |
|                             |                             | <i>Gammapapillomavirus 19</i>           | 94.3                 | 4.8      | 0.29x          | HPV-169                                       |  |
|                             | <i>Parvoviridae</i>         | <i>Human bocavirus</i>                  | 99.8                 | 48.4     | 85.9x          |                                               |  |
|                             |                             | <i>Picornaviridae</i>                   | <i>Aichivirus A</i>  | 98       | 16.3           | 3.8x                                          |  |
|                             |                             |                                         | <i>Aichivirus E</i>  | 88.5     | -              | -                                             |  |
|                             |                             |                                         | <i>Cardiovirus B</i> | 95.65    | -              | -                                             |  |
|                             |                             |                                         | <i>Cardiovirus C</i> | 93.6     | 7.3            | 0.77x                                         |  |
| <i>Cosavirus A</i>          |                             |                                         | 93.5                 | 6        | 0.49x          |                                               |  |
| <i>Enterovirus B</i>        |                             |                                         | 93.7                 | 3.5      | 0.21x          |                                               |  |
| <i>Enterovirus C</i>        |                             |                                         | 91.5                 | 6.7      | 1.2x           |                                               |  |
| <i>Hepatovirus A</i>        |                             |                                         | 98.5                 | 8.4      | 2.2x           | Coxsackie-A19                                 |  |
| <i>Human cosavirus</i>      |                             |                                         | 94.1                 | -        | -              |                                               |  |
| <i>Human enterovirus</i>    | 94.2                        |                                         | -                    | -        |                |                                               |  |
| <i>Polyomaviridae</i>       | <i>Parechovirus A</i>       | 97.2                                    | -                    | -        |                |                                               |  |
|                             | <i>Rhinovirus B</i>         | 97.6                                    | -                    | -        |                |                                               |  |
|                             | <i>Rosavirus B</i>          | 98.9                                    | 3                    | 0.1x     |                |                                               |  |
|                             | <i>Human polyomavirus 1</i> | 97.4                                    | 55.6                 | 28.4x    |                |                                               |  |
|                             | <i>Human polyomavirus 2</i> | 99.8                                    | 26.5                 | 6.1x     |                |                                               |  |
| <i>Human polyomavirus 5</i> | 99.8                        | 9.7                                     | 2.6x                 |          |                |                                               |  |
