# Supplementary material for: Wastewater-based epidemiology applied at the building-level reveals distinct virome profiles based on the age of the contributing individuals
Source: PubMed Central journal article supplement (PMC10832175; doi:10.1186/s40246-024-00580-1), 2024-02-01
Supplement: 40246_2024_580_MOESM2_ESM.pdf [file 40246_2024_580_MOESM2_ESM.pdf]

**Supplementary information 2:** Sample dates and pools of the nucleic acid extractions. Each column correspond to one pool

| School    |           |           |           | University |           |           |           | Nursing home |           |           | WWTP      |           |
|-----------|-----------|-----------|-----------|------------|-----------|-----------|-----------|--------------|-----------|-----------|-----------|-----------|
| A         |           | B         |           | A          |           | B         |           | A            |           | B         | C         |           |
| Pool 1    | Pool 2    | Pool 3    | Pool 4    | Pool 5     | Pool 6    | Pool 7    | Pool 8    | Pool 9       | Pool 10   | Pool 11   | Pool 12   | Pool 13   |
| 10/1/2022 | 10/3/2022 | 13/1/2022 | 17/3/2022 | 10/1/2022  | 10/3/2022 | 10/1/2022 | 17/3/2022 | 13/1/2022    | 10/3/2022 | 22/3/2022 | 18/1/2022 | 10/3/2022 |
| 13/1/2022 | 17/3/2022 | 20/1/2022 | 22/3/2022 | 18/1/2022  | 17/3/2022 | 13/1/2022 | 22/3/2022 | 20/1/2022    | 17/3/2022 | 10/3/2022 | 20/1/2022 | 22/3/2022 |
| 20/1/2022 | 22/3/2022 |           |           |            |           | 20/1/2022 |           | 22/3/2022    | 17/3/2022 |           |           |           |
